# Supplementary material for: Molecular harvesting with electroporation for tissue profiling
Source: PubMed Central journal article supplement (PMC6823461; doi:10.1038/s41598-019-51634-7), 2019-10-31
Supplement: 41598_2019_51634_MOESM1_ESM.pdf [file 41598_2019_51634_MOESM1_ESM.pdf]

## Molecular harvesting with electroporation for tissue profiling.

Alexander Golberg<sup>1\*</sup>, Julia Sheviriyov<sup>1</sup>, Oz Solomon<sup>2</sup>, Leon Anavy<sup>3</sup>, Zohar Yakhini<sup>2,3\*\*</sup>.

<sup>1</sup> Porter School of Environment and Earth Sciences, Tel Aviv University, Tel Aviv, Israel.

<sup>2</sup> School of Computer Science, Herzliya Interdisciplinary Center, Herzliya, Israel.

<sup>3</sup> Computer Science Department, Technion, Haifa, Israel.

### Supplementary information

#### Analysis of the molecular weight of the extracted with electroporation proteins from mouse liver and kidney.

Using semi-quantitative proteomic data, we calculated the molecular weight (MW), the normalized intensity for each sample (LFQ), intensity and normalized within sample intensity (iBAQ, **Fig. S 2,3a**) for proteins extracted from the liver (**Table S1**) and the kidney (**Table S2**). Using these quantitative data, we selected the list of most abundant proteins with  $iBAQ > 10^7$  for further analysis. The histogram and density function (**Fig. S3 b,c,d, S4 b,c,d**) suggested the e-harvested proteins have a not-normal and skewed to the right distribution function. The skewness and kurtosis plots of MW (**Fig. S3e, S4e**) suggested that MW has lognormal, gamma or Weibull distributions. Histogram of the fitted densities, Q-Q plot, CDF and P-P plots of these three distributions appear in **Fig. S3 f, g, h, i, and Fig 4f, g, h, i** respectively. The goodness of fit analysis (**Table S15, S16**) suggests that MW of the most abundant proteins extracted by electroporation is closer to lognormal distribution (smallest statistics for all checked criteria) (**Table S17, S18**). The parameters and the uncertainty in the parameters (confidence interval) for the lognormal distribution function were determined using bootstrapping <sup>1</sup>.

Interesting, the proteins extracted from the kidney had almost twice smaller MW than the proteins extracted from the liver. This can be explained by a different electroporation threshold of cells and by different diffusion properties of properties in these two media<sup>2</sup>.

#### Analysis of the molecular weight of the extracted with electroporation proteins from the HepG2 tumor.

Using semi-quantitative proteomic data, we calculated the molecular weight (MW), the normalized intensity for each sample (LFQ), and intensity and normalized within sample intensity (iBAQ, **Fig. S5a**) for proteins extracted from the HepG2 tumor (**Table S8**). Using these quantitative data, we selected the list of most abundant proteins with  $iBAQ > 10^7$  for further analysis. The histogram and density functions (**Fig. S5 b, c, d**) suggested the e-harvested proteins have a not-normal and skewed to the right distribution function. The skewness and kurtosis plots of MW (**Fig. S5e**) suggested that MW has lognormal, gamma or Weibull distributions. Histogram of the fitted densities, Q-Q plot, CDF and P-P plots of these three distributions appear in **Fig. S5 f, g, h, i** respectively. The goodness of fit analysis (**Table S19**) suggests that MW of the most abundant proteins extracted by electroporation is closer to lognormal distribution (smallest statistics for all checked criteria) (**Table S20**).

### Supplementary references

1. Efron, B.; Tibshirani, R. *An Introduction to the Bootstrap*; 1993.

2. Golberg, A.; Rubinsky, B. Mass transfer phenomena in Electroporation. In *Transport in Biological Media*; Elsevier, 2013; pp. 456–492.

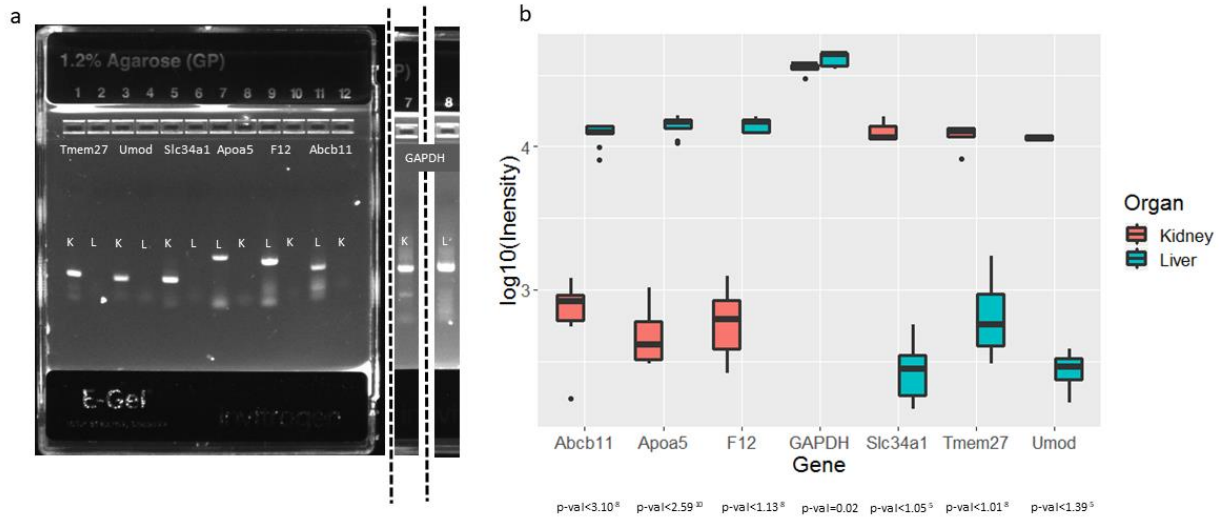

**Figure S1.** Differential expression of genes detected with RNA extracted with electroporation molecular harvesting in mouse liver and kidney N=6. **a.** Gel digital image. GAPDH was run on separate gels. **b.** Quantification of a signal.

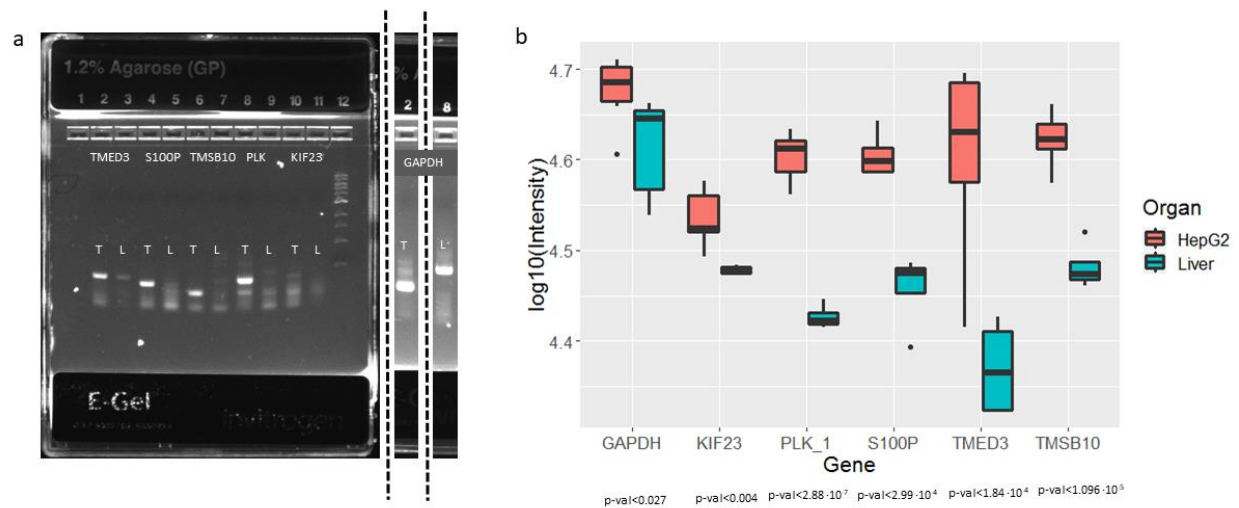

**Figure S2.** Differential expression of genes detected with RNA extracted using the proposed e-harvesting protocol from mouse liver and from HepG2. N=6. **a.** Gel digital image. GAPDH was run on separate gels. **b.** Quantification of a signal.

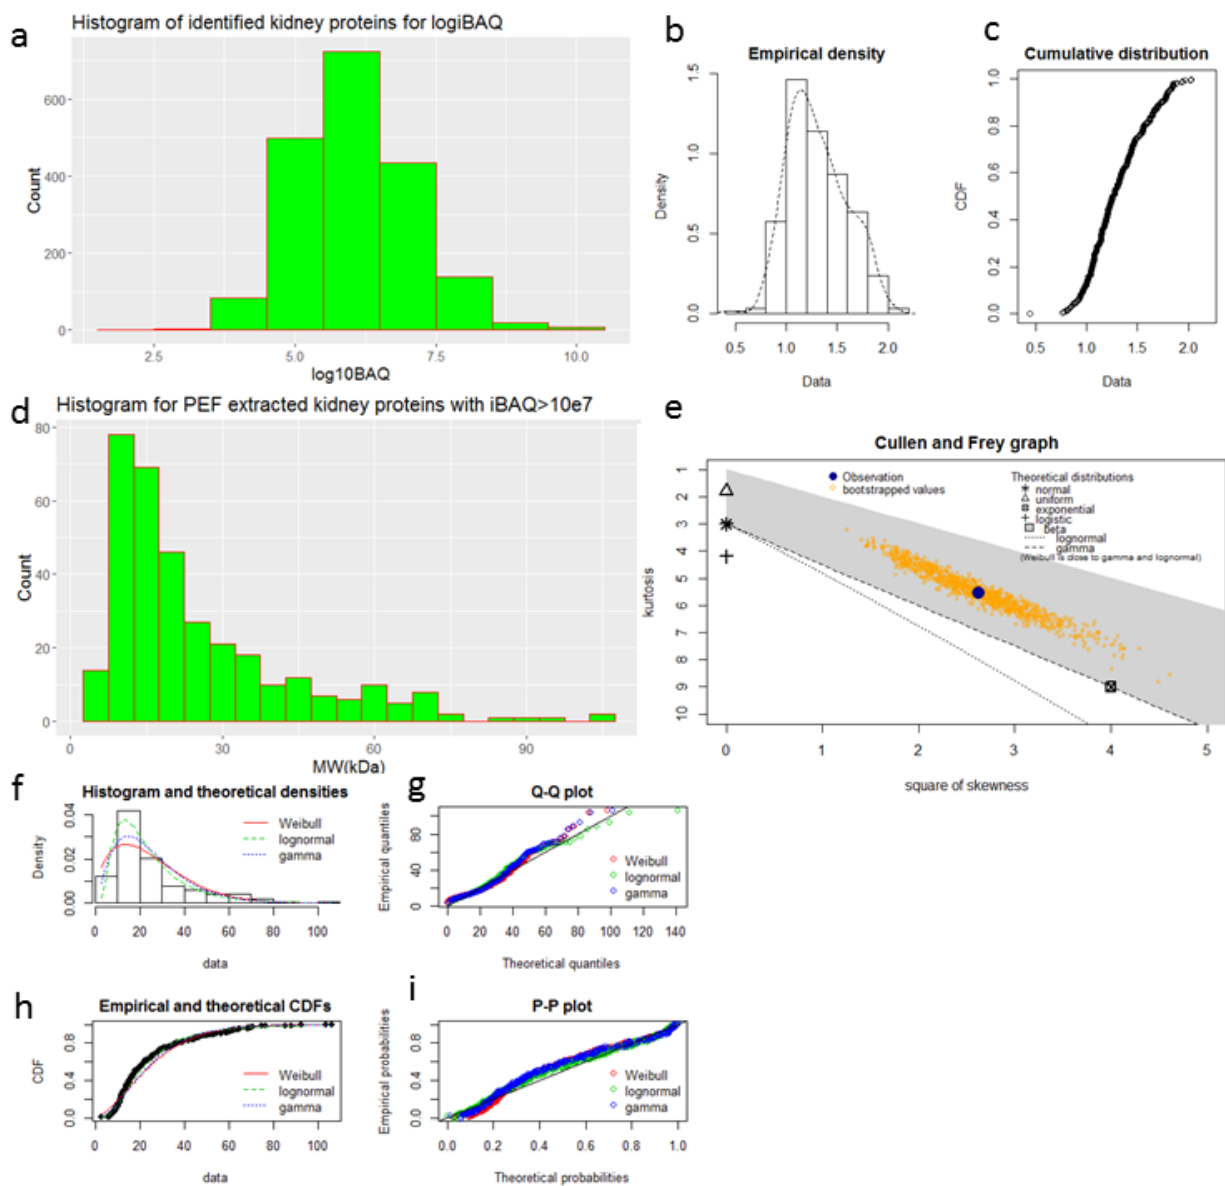

**Figure S3.** Molecular weights (MW) of proteins extraction with electroporation from a normal mouse liver. **a.** Histogram of MW of all extracted and identified proteins. **b.** Density function and **c.** Cumulative distribution of MW of the extractable proteins. **d.** Histogram of MW of extracted and identified proteins with iBAQ > 10<sup>7</sup>. **e.** Cullen and Frey graph for MW distribution analysis. **f.** Histogram of fitted densities. **g.** Q-Q plot of the fitted molecular weight distributions. **h.** CFD of the fitted molecular weight distributions. **i.** Q-Q plot of the fitted molecular weight distributions.

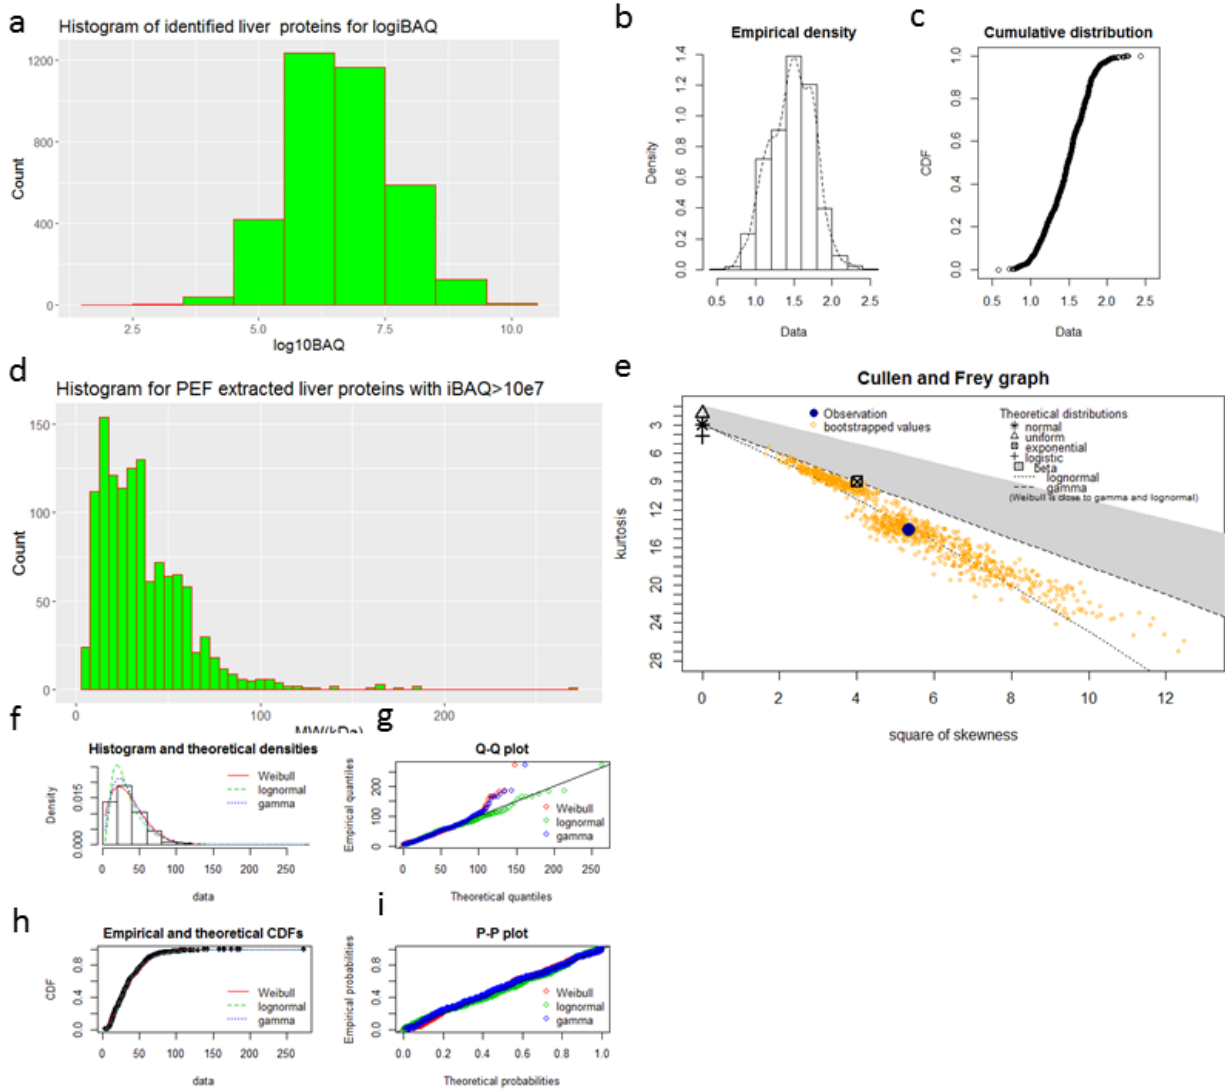

**Figure S4.** Molecular weights (MW) of proteins extraction with electroporation from a normal mouse kidney. **a.** Histogram of MW of all extracted and identified proteins. **b.** Density function and **c.** Cumulative distribution of MW of the extractable proteins. **d.** Histogram of MW of extracted and identified proteins with  $iBAQ > 10^7$ . **e.** Cullen and Frey graph for MW distribution analysis. **f.** Histogram of fitted densities. **g.** Q-Q plot of the fitted molecular weight distributions. **h.** CFD of the fitted molecular weight distributions. **i.** Q-Q plot of the fitted molecular weight distributions.

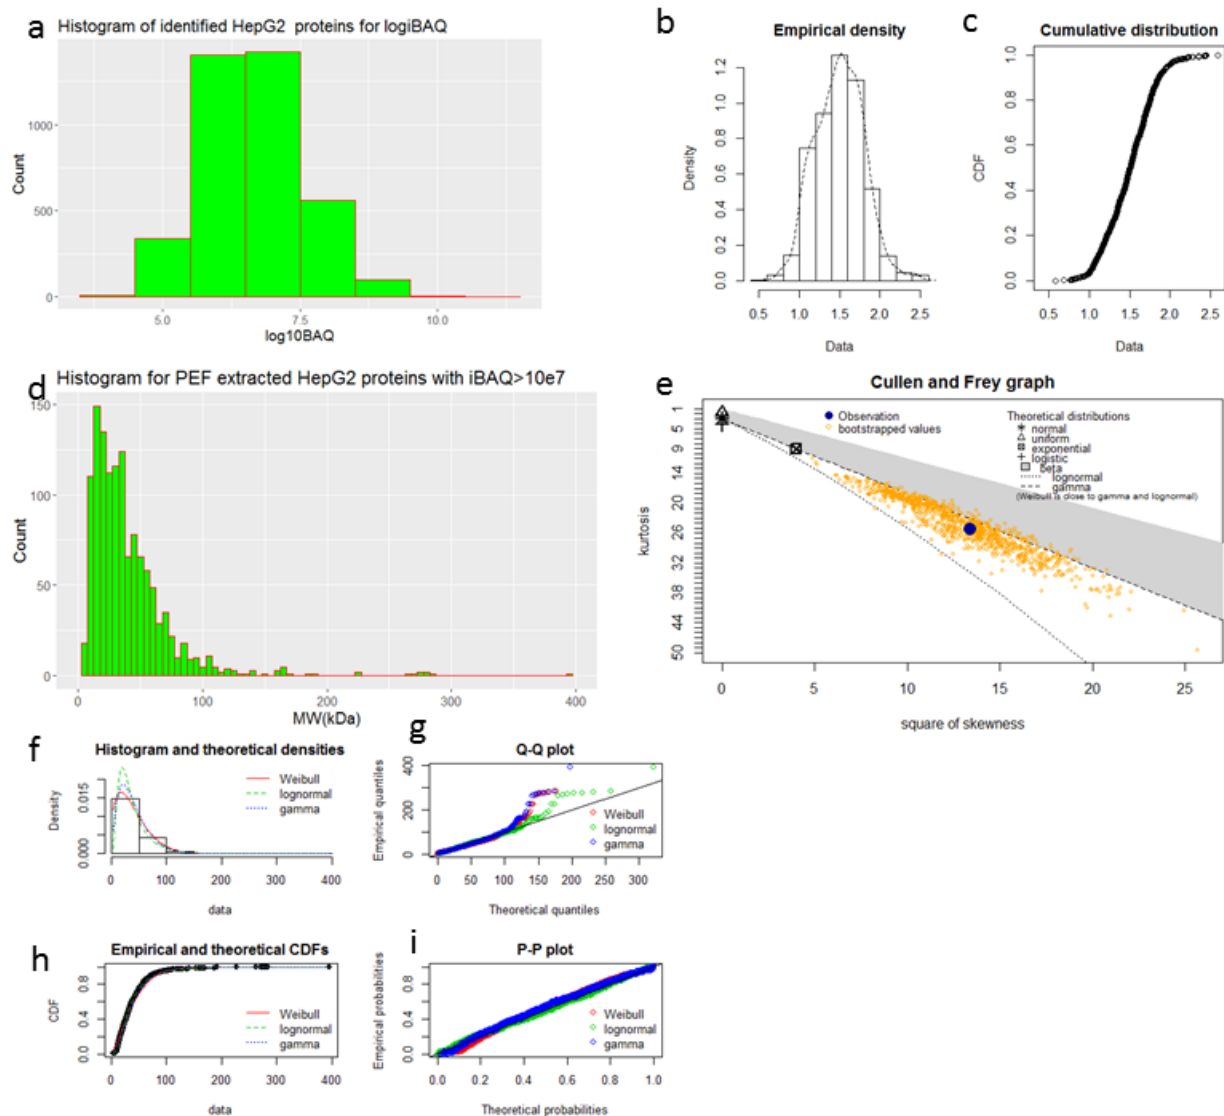

**Figure S5.** Molecular weights (MW) of proteins extraction with electroporation from a HepG2 tumor model in the mouse liver. **a.** Histogram of MW of all extracted and identified proteins. **b.** Density function and **c.** Cumulative distribution of MW of the extractable proteins. **d.** Histogram of MW of extracted and identified proteins with iBAQ>10<sup>7</sup>. **e.** Cullen and Frey graph for MW distribution analysis. **f.** Histogram of fitted densities. **g.** Q-Q plot of the fitted molecular weight distributions. **h.** CFD of the fitted molecular weight distributions. **i.** Q-Q plot of the fitted molecular weight distributions.

**Table S13.** Primers used for the mouse liver and mouse kidney differentiation by the RNA extracted with electroporation.

| <b>Gene Abbreviation</b> | <b>Gene name</b>                                             | <b>forward/reverse primer</b>                                                  |
|--------------------------|--------------------------------------------------------------|--------------------------------------------------------------------------------|
| <b>Slc34a1</b>           | <b>solute carrier family 34 (sodium phosphate), member 1</b> | 5'- GAT GTC CTA CAG CGA GAG ATT G -3'<br>5'- GGG AGC AGA CAA AGA GGT AAA -3'   |
| <b>Umod</b>              | <b>uromodulin</b>                                            | 5'- TCC CGG TTT GTA CTG CTA ATG -3'<br>5'- TGG ACA CCT TGT CGT GTT ATG -3'     |
| <b>Tmem27</b>            | <b>collectrin, amino acid transport regulator</b>            | 5'- GTT TGC GGC TCT GAA AGA ATG -3'<br>5'- CAC TGT TGA TCC GGT TCC TAT T -3'   |
| <b>Apoa5</b>             | <b>Apolipoprotein A-V</b>                                    | 5'- GAC GAC CTG TGG GAA GAT ATT G -3'<br>5'- CAG GAG GTA GGG ACT GTA TGA -3'   |
| <b>F12</b>               | <b>coagulation factor XII (Hageman factor)</b>               | 5'- GAG GAA CTG ACA GTG GTA CTT G -3'<br>5'- GGG AAG GAT AAA GCC TGG TTA G -3' |
| <b>Abcb11</b>            | <b>ATP Binding Cassette Subfamily B Member 11</b>            | 5'- CTG TGG GTT GGT GGA CAT TA -3'<br>5'- GAG AGG ACT TCA TCG GCA ATA G -3'    |
| <b>GAPDH_mouse</b>       | <b>Glyceraldehyde 3-phosphate dehydrogenase</b>              | 5'- GGG TGT GAA CCA CGA GAA ATA -3'<br>5'- GGG TCT GGG ATG GAA ATT GT -3'      |

**Table S14.** Primers used for the mouse liver and HepG2 kidney differentiation by the RNA extracted with electroporation.

| <b>Gene Abbreviation</b> | <b>Gene name</b>                                | <b>forward/reverse primer</b>                                                  |
|--------------------------|-------------------------------------------------|--------------------------------------------------------------------------------|
| <b>PLK1</b>              | Serine/threonine-protein kinase                 | 5'- CAG CAA GTG GGT GGA CTA TT -3'<br>5'- ATC AGT GGG CAC AAG ATG AG -3'       |
| <b>TMED3</b>             | Transmembrane p24 trafficking protein 3         | 5'- GAT TGA CTC CCA GAC GCA TTA C -3'<br>5'- CAG TCG GAT GCC TTC TGA TTA C -3' |
| <b>TMSB10</b>            | Thymosin beta-10                                | 5'- CGA GAC TGC ACG GAT TGT T -3'<br>5'- CAT CTT GCA GGT GGC TCT T -3'         |
| <b>S100P</b>             | S100 calcium-binding protein P                  | 5'- AGG AAG GTG GGT CTG AAT CT -3'<br>5'- AGG AAG GTG GGT CTG AAT CT -3'       |
| <b>KIF23</b>             | Kinesin-like protein KIF23                      | 5'- AGT GTG AGG TTG ATG CCT TAT T -3'<br>5'- CTC TGG TCC GGT TAG TTC TTT C -3' |
| <b>GAPDH_mouse</b>       | <b>Glyceraldehyde 3-phosphate dehydrogenase</b> | 5'- GGG TGT GAA CCA CGA GAA ATA -3'<br>5'- GGG TCT GGG ATG GAA ATT GT -3'      |
| <b>GAPDH_human</b>       | <b>Glyceraldehyde 3-phosphate dehydrogenase</b> | 5'- GAT TCC ACC CAT GGC AAA TTC -3'<br>5'- GTC ATG AGT CCT TCC ACG ATA C -3'   |

**Table S15.** The goodness of fit analysis of highly abundant electroporation extracted kidney proteins (iBAQ>10<sup>7</sup>).

| <b>Goodness-of-fit statistics</b> |                |                  |              |
|-----------------------------------|----------------|------------------|--------------|
|                                   | <b>Weibull</b> | <b>lognormal</b> | <b>gamma</b> |
| Kolmogorov-Smirnov statistic      | 0.1049928      | 0.06978198       | 0.1079061    |
| Cramer-von Mises statistic        | 1.3454622      | 0.43578147       | 1.1439954    |
| Anderson-Darling statistic        | 8.1846425      | 2.68808789       | 6.5859668    |
| <b>Goodness-of-fit criteria</b>   |                |                  |              |
| Akaike's Information Criterion    | 2776.322       | 2706.840         | 2746.318     |
| Bayesian Information Criterion    | 2783.968       | 2714.486         | 2753.965     |

**Table S16.** The goodness of fit analysis of highly abundant electroporation extracted liver proteins (iBAQ>10<sup>7</sup>).

| <b>Goodness-of-fit statistics</b> |                |                  |              |
|-----------------------------------|----------------|------------------|--------------|
|                                   | <b>Weibull</b> | <b>lognormal</b> | <b>gamma</b> |
| Kolmogorov-Smirnov statistic      | 0.05698024     | 0.0374255        | 0.03459732   |
| Cramer-von Mises statistic        | 0.84034789     | 0.4859410        | 0.36004244   |
| Anderson-Darling statistic        | 7.69096820     | 2.9875080        | 2.82114915   |
| <b>Goodness-of-fit criteria</b>   |                |                  |              |
| Akaike's Information Criterion    | 10940.07       | 10805.36         | 10845.93     |
| Bayesian Information Criterion    | 10950.31       | 10815.59         | 10856.16     |

**Table S17.** Parametric bootstrap medians and 95% percentile CI for lognormal distribution of the MW of electroporation extracted kidney proteins.

|                | <b>Median</b> | <b>2.5%</b> | <b>97.5%</b> |
|----------------|---------------|-------------|--------------|
| <b>meanlog</b> | 3.0043648     | 2.9364384   | 3.0735471    |
| <b>sdlog</b>   | 0.6527423     | 0.6061976   | 0.7046646    |

**Table S18.** Parametric bootstrap medians and 95% percentile CI for lognormal distribution of the MW of electroporation extracted liver proteins.

|                | <b>Median</b> | <b>2.5%</b> | <b>97.5%</b> |
|----------------|---------------|-------------|--------------|
| <b>meanlog</b> | 3.3893310     | 3.3525484   | 3.4260361    |
| <b>sdlog</b>   | 0.6514971     | 0.6241754   | 0.6792361    |



**Table S19.** The goodness of fit analysis of highly abundant electroporation extracted HepG2 proteins (iBAQ>10<sup>7</sup>).

| <b>Goodness-of-fit statistics</b> |                |                  |              |
|-----------------------------------|----------------|------------------|--------------|
|                                   | <b>Weibull</b> | <b>lognormal</b> | <b>gamma</b> |
| Kolmogorov-Smirnov statistic      | 0.08502379     | 0.02567092       | 0.05181307   |
| Cramer-von Mises statistic        | 2.15728759     | 0.16256876       | 1.04995599   |
| Anderson-Darling statistic        | 17.59556665    | 1.31084115       | 7.67302556   |
| <b>Goodness-of-fit criteria</b>   |                |                  |              |
| Akaike's Information Criterion    | 11712.26       | 11440.62         | 11584.03     |
| Bayesian Information Criterion    | 11722.56       | 11450.91         | 11594.33     |

**Table S20.** Parametric bootstrap medians and 95% percentile CI for lognormal distribution of the MW of PEF extracted HepG2 proteins.

|                | <b>Median</b> | <b>2.5%</b> | <b>97.5%</b> |
|----------------|---------------|-------------|--------------|
| <b>meanlog</b> | 3.4474497     | 3.4095316   | 3.486965     |
| <b>sdlog</b>   | 0.6928734     | 0.6671016   | 0.719039     |
